# Supplementary material for: First-principles study of phase stability, electronic and mechanical properties of plutonium sub-oxides
Source: Royal Society of Chemistry journal article supplement (doi:10.1039/c9cp01858a), 2019-01-01
Supplement: c9cp01858a1.pdf [file c9cp01858a1.pdf]

# First-Principles Study of Phase Stability, Electronic and Mechanical Properties of Plutonium Sub-oxides

P.S. Ghosh and A. Arya

Materials Science Division, Bhabha Atomic Research Centre, Trombay, Mumbai 400 085, India

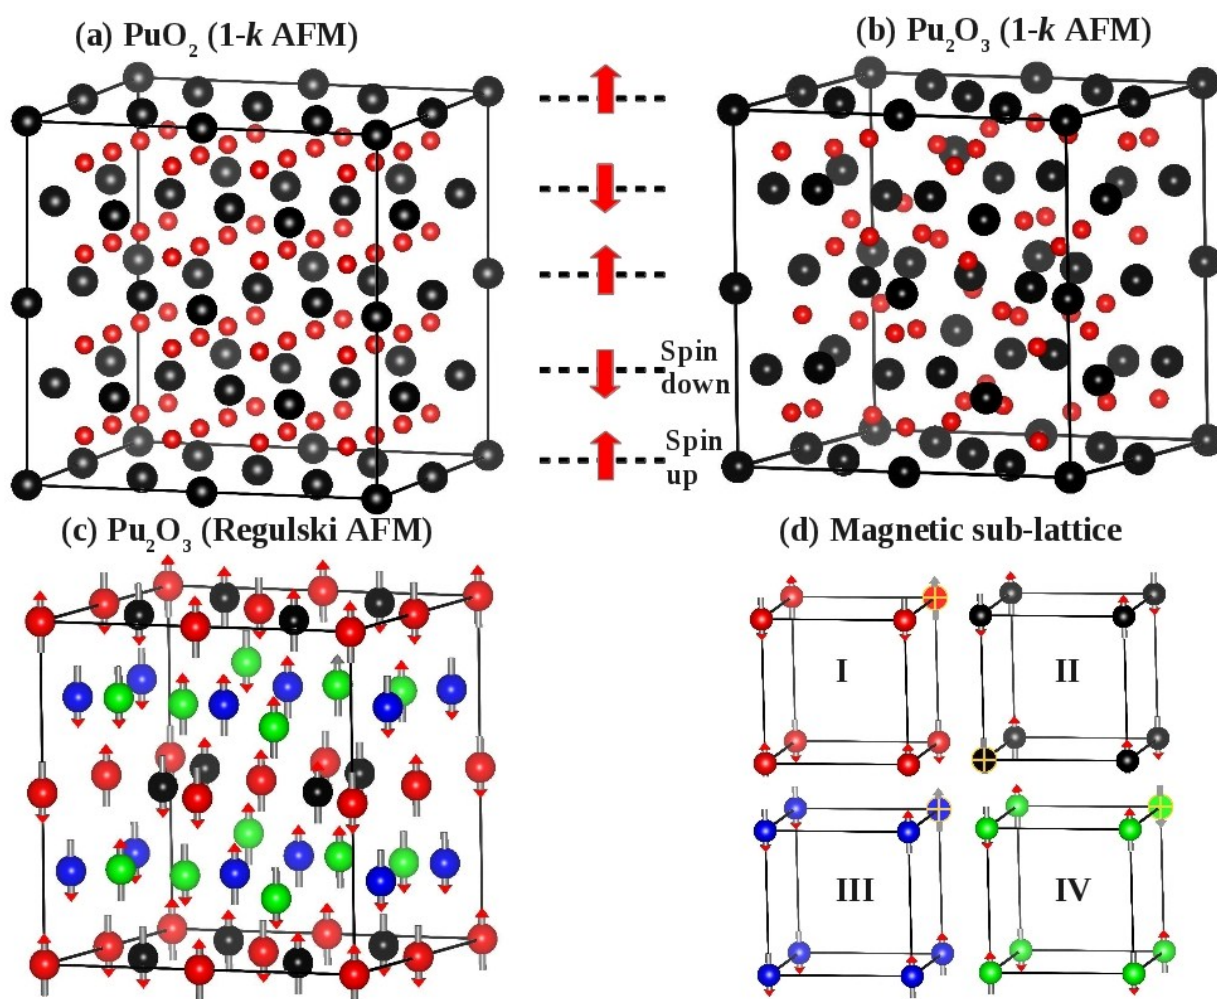

## Supplementary Information

**Figure S1:** Magnetic configurations of  $\text{PuO}_2$  and  $\text{Pu}_2\text{O}_3$ . (a) 1- $k$  AFM  $\text{PuO}_2$  with the magnetic order along (0 0 1) lattice direction; (b) 1- $k$  AFM  $\text{Pu}_2\text{O}_3$  with the magnetic order along (0 0 1) lattice direction; (c) Regulski AFM  $\text{Pu}_2\text{O}_3$  with four magnetic sublattices I, II, III and IV (d). In Fig. (a) and (b), the black and red balls designate Pu and O atoms, respectively. In Fig. (c), O atoms are removed for the sake of a clear indication of Pu magnetic order.
